# Supplementary material for: The Spatial Resolution of Epidemic Peaks
Source: PubMed Central journal article supplement (PMC3983068; doi:10.1371/journal.pcbi.1003561), 2014-04-10
Supplement: pcbi.1003561.s006.pdf [file pcbi.1003561.s006.pdf]

# Epidemic spreading across a theoretical population density
