# Supplementary material for: The Spatial Resolution of Epidemic Peaks
Source: PubMed Central journal article supplement (PMC3983068; doi:10.1371/journal.pcbi.1003561), 2014-04-10
Supplement: pcbi.1003561.s009.pdf [file pcbi.1003561.s009.pdf]

Table S2: Details of the 4 regions used in the main paper. All regions are 49x29 cells in size (2401 cells total), area varies according to latitude and longitude. Rio has a large number of zero regions because it is on the coast. Delhi has the highest population density but also the highest variance in population sizes. The map in Fig. S2 indicates the locations of these regions on the world map. Fig. S3 contains histograms of the population densities and spatial maps.

| Property                | Guangzhou  | Rio de Janeiro | Delhi       | New York   |
|-------------------------|------------|----------------|-------------|------------|
| Mean density            | 4,049      | 2,615          | 7,050       | 3,647      |
| Max density             | 58,685     | 29,227         | 64,633      | 75,177     |
| Variance                | 61,368,234 | 21,774,915     | 104,281,323 | 37,009,769 |
| Number of zeros         | 5          | 1,258          | 2           | 824        |
| Total population        | 9,722,479  | 6,280,196      | 16,926,573  | 8,755,909  |
| Area (km <sup>2</sup> ) | 1,900      | 1,903          | 1,814       | 1,567      |
| Minimum Longitude       | 113.0583   | -43.4          | 77.025      | -74.14167  |
| Maximum Longitude       | 113.4667   | -42.99167      | 77.43333    | -73.73333  |
| Minimum Latitude        | 22.925     | -23.11667      | 28.40833    | 40.46667   |
| Maximum Latitude        | 23.33333   | -22.70833      | 28.81667    | 40.875     |
